# Supplementary material for: Gene Expression Divergence is Coupled to Evolution of DNA Structure in Coding Regions
Source: PLoS Comput Biol. 2011 Nov 17;7(11):e1002275. doi: 10.1371/journal.pcbi.1002275 (PMC3219629; doi:10.1371/journal.pcbi.1002275)
Supplement: Table S1 — List of dinucleotide/trinucleotide DNA structural scales and their corresponding parameters. (XLS) [file pcbi.1002275.s012.xls]

## Sheet: property names
Table S1 List of dinucleotide/trinucleotide DNA structural scales and their corresponding parameters
Property Name	Reference	PubMedID	Type	Dimension	Comments
DNA denaturation	Statistical mechanical simulation of polymeric DNA melting with MELTSIM	10366657	thermodynamic	cal/mol	Dinucleotides with a low value are more likely to denaturate than dinucleotides with a higher value
Duplex Disrupt Energy	Predicting DNA duplex stability from the base sequence	3459152	thermodynamic	kcal	Dinucleotides with a high disrupt energy value will be more stable than dinucleotides with a lower energy value
Duplex Free Energy	Improved Thermodynamic Parameters and Helix Initiation Factor to Predict Stability of DNA Duplexes	8948641	thermodynamic	kcal/mol	Dinucleotides with a low free energy content will be more stable than dinucleotides with high free energy content
Stacking Energy	An optimized potential function for the calculation of nucleic acid interaction energies: base stacking	DOI: 10.1002/bip.1978.360171005	thermodynamic	kcal	High values in base stacking reflect dinucleotides of the helix that de-stack or melt more easily; conversely a minimal value would represent more stable dinucleotides
Enthalpy	Improved thermodynamic parameters and helix initiation factor to predict stability of DNA duplexes. Nucleic Acids Research (1996) 24 Nr. 22, 4501-4505	8948641	thermodynamic	kcal/mol	Values given in the paper (delta H). Low values correspond to strong DNA stability.
Entropy	Improved thermodynamic parameters and helix initiation factor to predict stability of DNA duplexes. Nucleic Acids Research (1996) 24 Nr. 22, 4501-4505	8948641	thermodynamic	cal/mol/K	Values are given in the paper (delta S).Low values correspond to strong DNA stability.
Melting Temperature	From the sequence to the superstructural properties of DNAs. Biophysical Chemistry (2002) 95, 23-47	11880171	thermodynamic	others	Normalized melting temperatures of O. Gotoh and Y. Tagashira (1981), Biopolymers, 20, 1033-1042
Twist (free DNA)	The relative flexibility of B-DNA and A-RNA duplexes: database analysis. Nucleic Acids Research (2004) 32 No. 20	15562006	conformational	degree	Values are given in the supplementary. See figure 1 in Satoshi Fujii et al.(2007) Nucleic Acids Research, 35, 6063–6074 for definition
Tilt (free DNA)	The relative flexibility of B-DNA and A-RNA duplexes: database analysis. Nucleic Acids Research (2004) 32 No. 20	15562006	conformational	degree	Values are given in the supplementary. See figure 1 in Satoshi Fujii et al.(2007) Nucleic Acids Research, 35, 6063–6075 for definition
Roll (free DNA)	The relative flexibility of B-DNA and A-RNA duplexes: database analysis. Nucleic Acids Research (2004) 32 No. 20	15562006	conformational	degree	Values are given in the supplementary. See figure 1 in Satoshi Fujii et al.(2007) Nucleic Acids Research, 35, 6063–6076 for definition
Shift (free DNA)	The relative flexibility of B-DNA and A-RNA duplexes: database analysis. Nucleic Acids Research (2004) 32 No. 20	15562006	conformational	angstroem	Values are given in the supplementary. See figure 1 in Satoshi Fujii et al.(2007) Nucleic Acids Research, 35, 6063–6077 for definition
Slide (free DNA)	The relative flexibility of B-DNA and A-RNA duplexes: database analysis. Nucleic Acids Research (2004) 32 No. 20	15562006	conformational	angstroem	Values are given in the supplementary. See figure 1 in Satoshi Fujii et al.(2007) Nucleic Acids Research, 35, 6063–6078 for definition
Rise (free DNA)	The relative flexibility of B-DNA and A-RNA duplexes: database analysis. Nucleic Acids Research (2004) 32 No. 20	15562006	conformational	angstroem	Values are given in the supplementary. See figure 1 in Satoshi Fujii et al.(2007) Nucleic Acids Research, 35, 6063–6079 for definition
Roll (DNA-protein complex)	Role of base-backbone and base-base interactions in alternating DNA conformations FEBS Letters (1996) 379, 148-152	8635581	conformational	degree	Values are in the Paper under COMPLEX. See figure 1 in Satoshi Fujii et al.(2007) Nucleic Acids Research, 35, 6063–6074 for definition
Twist (DNA-protein complex)	Role of base-backbone and base-base interactions in alternating DNA conformations FEBS Letters (1996) 379, 148-152	8635581	conformational	degree	Values are in the Paper under COMPLEX. See figure 1 in Satoshi Fujii et al.(2007) Nucleic Acids Research, 35, 6063–6075 for definition
Tilt (DNA-protein complex)	Role of base-backbone and base-base interactions in alternating DNA conformations FEBS Letters (1996) 379, 148-152	8635581	conformational	degree	Values are in the Paper under COMPLEX. See figure 1 in Satoshi Fujii et al.(2007) Nucleic Acids Research, 35, 6063–6076 for definition
Slide (DNA-protein complex)	Role of base-backbone and base-base interactions in alternating DNA conformations FEBS Letters (1996) 379, 148-152	8635581	conformational	angstroem	Values are in the Paper under COMPLEX. See figure 1 in Satoshi Fujii et al.(2007) Nucleic Acids Research, 35, 6063–6077 for definition
Shift (DNA-protein complex)	Role of base-backbone and base-base interactions in alternating DNA conformations FEBS Letters (1996) 379, 148-152	8635581	conformational	angstroem	Values are in the Paper under COMPLEX. See figure 1 in Satoshi Fujii et al.(2007) Nucleic Acids Research, 35, 6063–6078 for definition
Rise (DNA-protein complex)	Role of base-backbone and base-base interactions in alternating DNA conformations FEBS Letters (1996) 379, 148-152	8635581	conformational	angstroem	Values are in the Paper under COMPLEX. See figure 1 in Satoshi Fujii et al.(2007) Nucleic Acids Research, 35, 6063–6079 for definition
Wedge	CURVATURE: software for the analysis of curved DNA Bioinformatics (1993) 9 Nr. 4, 435-440	8402210	conformational	degree	Data taken from Bolshoy et al.: PNAS (1991) 88, 2312-2316
Tip	Combining structural analysis of DNA with search routines for the detection of transcription regulatory elements. Comput. Appl. Biosci. (1996)12 Nr. 5, 441-446	8996793	conformational	degree	Values are not listed in the article but referenced to a file that cant be accessed any more. Values taken from PROPERTY DB. Calculated by Sklenar, and averaged by Ponomarenko
DNA Bending stiffness	Translational Positioning of Nucleosomes on DNA The Role of Sequence-dependent Isotropic DNA Bending Stiffness	7723041	conformational	nm	High values correspond to dinucleotides that will bend more easily , while low values correspond to dinucleotides that are more rigid
Propeller twist	B-DNA Twisting Correlates with Base-pair Morphology	7897660	conformational	degree	Dinucleotides with a large negative propeller-twist angle tend to be more rigid than dinucleotides with low negative propeller-twist angle.
Protein Induced Deformability	DNA sequence-dependent deformability deduced from protein–DNA crystal complexes	9736707	conformational	others	a larger value reflects a more deformable sequence while a smaller value indicates a region where the DNA helix is less likely to be changed dramatically by proteins
Bendability	Trinucleotide models for DNA bending propensity: comparison of models based on DNaseI digestion and nucleosome packaging data	8579790	conformational		The trinucleotide bendability model is based on Dnase I cutting frequencies. The enzyme Dnase I preferably binds to the minor groove and cuts DNA that is bent, or bendable toward the major groove. Thus Dnase I cutting frequencies on naked DNA can be interpreted as a quantitative measure of major groove compressibility or bendability. DNA regions with a high peak correspond to regions that are mor…
Nucleosome Position Preference	Sequence periodicities in chicken nucleosome core DNA	3806678	conformational		NPP is a trinucleotide model based on the preferential location of sequences within a nucleosomal core. The study was performed on sequences wrapped around nucleosome cores and in closed circles of DNA. They calculated the fractional preference of each base pair triplet for a position facing out. High value peaks represent regions where nucleosomes are more likely to appear.
Major Groove Width	Combining structural analysis of DNA with search routines for the detection of transcription regulatory elements. Comput. Appl. Biosci. (1996)12 Nr. 5, 441-446	8996793	conformational	angstroem	Values are not listed in the article but referenced to a file that cant be accessed any more. Values taken from PROPERTY DB.
Major Groove Depth	Combining structural analysis of DNA with search routines for the detection of transcription regulatory elements. Comput. Appl. Biosci. (1996)12 Nr. 5, 441-446	8996793	conformational	angstroem	Values are not listed in the article but referenced to a file that cant be accessed any more. Values taken from PROPERTY DB.
Minor Groove Width	Combining structural analysis of DNA with search routines for the detection of transcription regulatory elements. Comput. Appl. Biosci. (1996)12 Nr. 5, 441-446	8996793	conformational	angstroem	Values are not listed in the article but referenced to a file that cant be accessed any more. Values taken from PROPERTY DB.
Minor Groove Depth	Combining structural analysis of DNA with search routines for the detection of transcription regulatory elements. Comput. Appl. Biosci. (1996)12 Nr. 5, 441-446	8996793	conformational	angstroem	Values are not listed in the article but referenced to a file that cant be accessed any more. Values taken from PROPERTY DB.
Major Groove Size	B-DNA Twisting Correlates with Base-pair Morphology J. Mol. Biol. (1995) 247, 34-48	7897660	conformational	angstroem
Major Groove Distance	B-DNA Twisting Correlates with Base-pair Morphology J. Mol. Biol. (1995) 247, 34-48	7897660	conformational	angstroem
Minor Groove Size	B-DNA Twisting Correlates with Base-pair Morphology J. Mol. Biol. (1995) 247, 34-48	7897660	conformational	angstroem
Minor Groove Distance	B-DNA Twisting Correlates with Base-pair Morphology J. Mol. Biol. (1995) 247, 34-48	7897660	conformational	angstroem
hydroxyl radical cleavage pattern	Construction of a genome-scale structural map at single-nucleotide resolution	17568010	conformational		The hydroxyl radical cleavage pattern is a measure of the local variation in solvent-accessible surface area of duplex DNA, and thus provides information on the local shape and structure of DNA.It is a reflection of an important structural parameter, the solvent-accessible surface area of the DNA backbone. The cleavage pattern thus provides an image of the shape of the DNA backbone and how it var…

## Sheet: dinucleotide parameters
Property Name	AA	AC	AG	AT	CA	CC	CG	CT	GA	GC	GG	GT	TA	TC	TG	TT
DNA denaturation	66.51	108.8	85.12	72.29	64.92	99.31	88.84	85.12	80.03	135.83	99.31	108.8	50.11	80.03	64.92	66.51
Duplex Disrupt Energy	1.9	1.3	1.6	0.9	1.9	3.1	3.6	1.6	1.6	3.1	3.1	1.3	1.5	1.6	1.9	1.9
Duplex Free Energy	-1.2	-1.5	-1.5	-0.9	-1.7	-2.3	-2.8	-1.5	-1.5	-2.3	-2.3	-1.5	-0.9	-1.5	-1.7	-1.2
Stacking Energy	-5.37	-10.51	-6.78	-6.57	-6.57	-8.26	-9.69	-6.78	-9.81	-14.59	-8.26	-10.51	-3.82	-9.81	-6.57	-5.37
Enthalpy	-8	-9.4	-6.6	-5.6	-8.2	-10.9	-11.8	-6.6	-8.8	-10.5	-10.9	-9.4	-6.6	-8.8	-8.2	-8
Entropy	-21.9	-25.5	-16.4	-15.2	-21	-28.4	-29	-16.4	-23.5	-26.4	-28.4	-25.5	-18.4	-23.5	-21	-21.9
Melting Temperature	0.945	1.07	0.956	0.952	0.945	1.036	0.997	0.956	1.037	1.18	1.036	1.07	0.894	1.037	0.945	0.945
Twist (free DNA)	35	32	28	31	43	35	31	28	41	40	35	32	43	41	43	35
Tilt (free DNA)	0.1	-0.3	0.2	0.3	0	0.1	0	0.2	0	0	0.1	-0.3	-1.4	0	0	0.1
Roll (free DNA)	1.4	1.4	5.5	-1.2	-1.2	3.9	6.2	5.5	0.4	-6.8	3.9	1.4	-0.6	0.4	-1.2	1.4
Shift (free DNA)	-0.06	0.06	0.06	0.12	0.02	0.05	0.06	0.06	0	-0.3	0.05	0.06	-0.17	0	0.02	-0.06
Slide (free DNA)	-0.16	-0.43	0.34	-0.57	1.88	0.28	0.68	0.34	-0.01	0.31	0.28	-0.43	0.38	-0.01	1.88	-0.16
Rise (free DNA)	3.28	3.23	3.27	3.3	3.32	3.4	3.25	3.27	3.43	3.57	3.4	3.23	3.37	3.43	3.32	3.28
Roll (DNA-protein complex)	0.8	-0.2	5.6	0	6.4	3.3	6.5	5.6	2.4	-2	3.3	-0.2	2.7	2.4	6.4	0.8
Twist (DNA-protein complex)	35.6	31.1	31.9	29.3	35.9	33.3	34.9	31.9	35.9	34.6	33.3	31.1	39.5	35.9	35.9	35.6
Tilt (DNA-protein complex)	1.9	-0.1	1.3	0	0.3	1	0	1.3	1.7	0	1	-0.1	0	1.7	0.3	1.9
Slide (DNA-protein complex)	0.1	-0.6	-0.3	-0.7	0.4	-0.1	0.7	-0.3	0.1	-0.3	-0.1	-0.6	0.1	0.1	0.4	0.1
Shift (DNA-protein complex)	0.1	-0.1	-0.2	0	0	0	0	-0.2	0.3	0	0	-0.1	0	0.3	0	0.1
Rise (DNA-protein complex)	3.3	3.4	3.4	3.3	3.4	3.4	3.4	3.4	3.4	3.4	3.4	3.4	3.4	3.4	3.4	3.3
Wedge	7.2	1.1	8.4	2.6	3.5	2.1	6.7	8.4	5.3	5	2.1	1.1	0.9	5.3	3.5	7.2
Tip	1.76	2	0.9	1.87	-1.64	0.71	0.22	0.9	1.35	2.5	0.71	2	6.7	1.35	-1.64	1.76
DNA Bending stiffness	35	60	60	20	60	130	85	60	60	85	130	60	20	60	60	35
Propeller twist	-17.3	-6.7	-14.3	-16.9	-8.6	-12.8	-11.2	-14.3	-15.1	-11.7	-12.8	-6.7	-11.1	-15.1	-8.6	-17.3
Protein Induced Deformability	2.9	2.3	2.1	1.6	9.8	6.1	12.1	2.1	4.5	4	6.1	2.3	6.3	4.5	9.8	2.9
Major Groove Width	12.15	12.37	13.51	12.87	13.58	15.49	14.42	13.51	13.93	14.55	15.49	12.37	12.32	13.93	13.58	12.15
Major Groove Depth	9.12	9.41	8.96	8.96	8.67	8.45	8.81	8.96	8.76	8.67	8.45	9.41	9.6	8.76	8.67	9.12
Minor Groove Width	5.3	6.04	5.19	5.31	4.79	4.62	5.16	5.19	4.71	4.74	4.62	6.04	6.4	4.71	4.79	5.3
Minor Groove Depth	9.03	8.79	8.98	8.91	9.09	8.99	9.06	8.98	9.11	8.98	8.99	8.79	9	9.11	9.09	9.03
Major Groove Size	3.98	3.98	4.7	4.7	3.98	3.98	4.7	4.7	3.26	3.26	3.98	3.98	3.26	3.26	3.98	3.98
Major Groove Distance	3.38	3.03	3.36	3.02	3.79	3.38	3.77	3.36	3.4	3.04	3.38	3.03	3.81	3.4	3.79	3.38
Minor Groove Size	2.98	3.26	3.98	3.26	3.7	3.98	4.7	3.98	2.98	3.26	3.98	3.26	2.7	2.98	3.7	2.98
Minor Groove Distance	2.94	4.22	2.79	4.2	3.09	2.8	3.21	2.79	2.95	4.24	2.8	4.22	2.97	2.95	3.09	2.94

## Sheet: trinucleotide parameters
Property Name	Bendability	Nucleosome Position Preference		hydroxyl radical cleavage pattern	pk1	pk2	pk3
AAA	-0.274	-36		AAA	-0.164588	-0.0805294	-0.585176
AAC	-0.205	-6		AAC	-0.14725	0.0636111	0.227306
AAG	-0.081	6		AAG	-0.0716563	0.023625	0.537094
AAT	-0.28	-30		AAT	-0.104342	-0.158789	-0.00286842
ACA	-0.006	6		ACA	-0.171375	0.957094	-0.482844
ACC	-0.032	8		ACC	-0.0302647	0.596588	-0.122647
ACG	-0.033	8		ACG	-0.195	0.707235	0.488176
ACT	-0.183	11		ACT	-0.0656471	0.461559	-0.328324
AGA	0.027	-9		AGA	-0.284444	1.05567	-0.000972222
AGC	0.017	25		AGC	-0.148438	1.03047	0.596688
AGG	-0.057	8		AGG	-0.444706	0.690294	0.813382
AGT	-0.183	11		AGT	-0.0599118	1.16162	0.640647
ATA	0.182	-13		ATA	-0.2825	0.759156	-0.546344
ATC	-0.11	7		ATC	-0.025125	0.604156	-0.0878125
ATG	0.134	18		ATG	-0.156471	0.655647	0.392029
ATT	-0.28	-30		ATT	-0.110789	0.517237	-0.336053
CAA	0.015	-9		CAA	0.635667	-0.262639	0.444028
CAC	0.04	17		CAC	0.478531	-0.383406	1.14413
CAG	0.175	-2		CAG	0.695906	-0.498875	1.58003
CAT	0.134	18		CAT	0.727912	-0.283588	1.29835
CCA	-0.246	8		CCA	0.287656	0.129	-0.202781
CCC	-0.012	13		CCC	0.215167	-0.213389	0.115417
CCG	-0.136	2		CCG	0.416938	-0.0073125	0.809469
CCT	-0.057	8		CCT	0.379882	-0.0424118	0.168118
CGA	-0.003	31		CGA	0.517344	0.746531	0.625062
CGC	-0.077	25		CGC	0.355194	0.491222	1.33253
CGG	-0.136	2		CGG	0.364938	0.280375	1.34528
CGT	-0.033	8		CGT	0.574265	0.747647	1.68741
CTA	0.09	-18		CTA	0.359806	0.0130833	-0.05475
CTC	0.031	8		CTC	0.337618	-0.155706	0.405765
CTG	0.175	-2		CTG	0.523	-0.135156	0.828875
CTT	-0.081	6		CTT	0.345813	0.014125	0.357938
GAA	-0.037	-12		GAA	0.827765	0.184265	-0.0299118
GAC	-0.013	8		GAC	0.693147	0.189176	0.699471
GAG	0.031	8		GAG	0.748971	0.130912	0.949618
GAT	-0.11	7		GAT	0.992406	0.340406	0.6195
GCA	0.076	13		GCA	0.808625	1.09862	-0.406438
GCC	0.107	45		GCC	0.817559	0.747176	-0.122618
GCG	-0.077	25		GCG	0.851861	1.17822	0.516778
GCT	0.017	25		GCT	0.772813	1.1705	0.0320625
GGA	0.013	-5		GGA	0.392324	0.849412	0.0139118
GGC	0.107	45		GGC	0.520588	0.999882	0.963412
GGG	-0.012	13		GGG	0.339694	0.769917	0.796
GGT	-0.032	8		GGT	0.645824	1.35947	0.550147
GTA	0.025	-6		GTA	0.759781	0.895781	-0.257531
GTC	-0.013	8		GTC	1.07285	0.8915	0.360794
GTG	0.04	17		GTG	0.974562	0.98775	0.659656
GTT	-0.205	-6		GTT	1.11656	1.11475	-0.00352778
TAA	0.068	-20		TAA	0.282722	-0.363861	0.0355
TAC	0.025	-6		TAC	0.292938	-0.306031	0.746156
TAG	0.09	-18		TAG	0.376528	-0.521833	0.936528
TAT	0.182	-13		TAT	0.518375	-0.322	0.752531
TCA	0.194	8		TCA	0.374812	0.366687	-0.28475
TCC	0.013	-5		TCC	0.296971	0.151	-0.0449118
TCG	-0.003	31		TCG	0.311281	0.0122188	0.582344
TCT	0.027	-9		TCT	0.25525	-0.0692778	-0.0996944
TGA	0.194	8		TGA	-0.02725	0.627281	0.229
TGC	0.076	13		TGC	0.492219	0.777937	1.3485
TGG	-0.246	8		TGG	0.253344	0.149844	1.08469
TGT	-0.006	6		TGT	0.509406	0.721594	1.06375
TTA	0.068	-20		TTA	0.12775	-0.0636389	-0.559472
TTC	-0.037	-12		TTC	0.499912	0.0413529	-0.201
TTG	0.015	-9		TTG	0.405417	-0.245028	0.37175
TTT	-0.274	-36		TTT	0.342882	-0.235	-0.505471
