# Supplementary material for: Gene Expression Divergence is Coupled to Evolution of DNA Structure in Coding Regions
Source: PLoS Comput Biol. 2011 Nov 17;7(11):e1002275. doi: 10.1371/journal.pcbi.1002275 (PMC3219629; doi:10.1371/journal.pcbi.1002275)
Supplement: Table S2 — The correlation in the contribution of structural evolution to gene expression divergence among Drosophila and yeast species. For each type of structural evolution, we used the P-value from Mann-Whitney U-test, which was performed between genes with significant cis-effects to gene expression divergence and the other genes, to represent the degree of contribution of this type of structural evolution to gene expression divergence. (XLS) [file pcbi.1002275.s013.xls]

## Sheet: Sheet1
Table S2 The correlation in the contribution of structural evolution to gene expression divergence
among Drosophila and yeast species. For each type of structural evolution, we used the P-value from
Mann-Whitney U-test, which was performed between genes with
significant cis-effects to gene expression divergence and the other genes,
to represent the degree of contribution of this type of structural evolution to gene expression divergence.
Pearson correlation coefficient/statistical significance (P-value)
	S. cerevisiae-S. paradoxus pair	S. cerevisiae-S. bayanus pair	D. melanogaster-D. simulans pair	D. melanogaster-D. sechellia pair
S. cerevisiae-S. paradoxus pair	-	-0.12/0.49	0.29/0.003	0.30/0.01
S. cerevisiae-S. bayanus pair	-	-	-0.04/0.80	-0.01/0.97
D. melanogaster-D. simulans pair	-	-	-	0.90/1.33E-13
D. melanogaster-D. sechellia pair	-	-	-	-
