# Supplementary material for: Gene Expression Divergence is Coupled to Evolution of DNA Structure in Coding Regions
Source: PLoS Comput Biol. 2011 Nov 17;7(11):e1002275. doi: 10.1371/journal.pcbi.1002275 (PMC3219629; doi:10.1371/journal.pcbi.1002275)
Supplement: Table S3 — The correlation of DNA structural levels with histone modification levels in coding regions. The Pearson correlation coefficients are shown. (XLS) [file pcbi.1002275.s014.xls]

## Sheet: Sheet1
Table S3 The correlation of DNA structural levels with histone modification levels in coding regions.
The Pearson correlation coefficients are shown.
	Duplex Disrupt Energy	Duplex Free Energy	Enthalpy	Entropy	Roll (free DNA)	Rise (free DNA)	Slide (DNA-protein complex)	Shift (DNA-protein complex)	Rise (DNA-protein complex)	Tip	DNA Bending stiffness	Major Groove Depth	Bendability	Nucleosome Position Preference
H3K9 ac	0.43929	-0.474	-0.448921	-0.42682	0.27236	0.339493	0.138678	-0.354312	0.472274	-0.39967	0.471813	-0.411682	0.28654	0.4699
H3K14 ac	0.169033	-0.191036	-0.180492	-0.17149	0.19435	0.109969	0.0318379	-0.209865	0.225737	-0.178309	0.205535	-0.158624	0.15682	0.210943
H4 ac	0.218247	-0.247946	-0.225425	-0.209358	0.21511	0.195673	0.0383129	-0.213798	0.283741	-0.214217	0.256911	-0.221553	0.232834	0.272041
H3K4 me1	0.016326	-0.0116617	-0.0163558	-0.0192101	0.0130649	0.026648	0.0768129	0.100334	-0.0206519	-0.0317779	0.00436147	-0.042245	-0.0708805	-0.0131793
H3K4 me2	0.221497	-0.240415	-0.235132	-0.228539	0.211584	0.153568	0.0989167	-0.150516	0.243988	-0.225346	0.243964	-0.217414	0.128754	0.238368
H3K4 me3	0.103853	-0.131343	-0.126541	-0.119972	0.192291	0.0361053	0.0554748	-0.1215	0.158762	-0.164555	0.144427	-0.118048	0.0760558	0.141323
H3K36 me3	0.0234826	-0.0533584	-0.0670379	-0.0704026	0.0890016	-0.0532735	0.0892072	0.0273376	0.0427091	-0.139725	0.0565863	-0.0657737	-0.0984648	0.031683
H3K79 me3	-0.252524	0.240796	0.23708	0.23549	0.0026808	-0.206874	0.0422771	0.276663	-0.237167	0.0947198	-0.234865	0.159492	-0.220713	-0.252372
H3K4 me2	0.0612346	-0.0702174	-0.0712821	-0.0722336	0.0686742	0.0203644	-0.0319166	-0.0901832	0.0896277	-0.0423424	0.0769827	-0.0401022	0.0638744	0.0836956
H3K36 me3	-0.261531	0.267772	0.251534	0.240949	-0.0805198	-0.237963	-0.0132672	0.252622	-0.271845	0.179434	-0.26425	0.2193	-0.238268	-0.280692
H2AK7 ac	0.0322538	-0.0318343	-0.0209574	-0.0143446	0.0694387	0.0369698	-0.0253997	-0.0790827	0.0541526	-0.0103122	0.0358987	-0.0150746	0.0882432	0.0445055
H2AZK14 ac	0.172342	-0.216892	-0.211246	-0.202695	0.158795	0.0857368	0.0454084	-0.178117	0.237685	-0.235206	0.223715	-0.183598	0.0929564	0.219403
H2BK11 ac	0.0195916	-0.0137039	0.00138633	0.0082351	0.0531744	0.0632774	-0.0446925	-0.044571	0.033091	0.0254022	0.0192464	-0.0107183	0.10018	0.0310996
H2BK16 ac	0.0228171	-0.0164754	-0.000102225	0.00754513	0.0486432	0.07072	-0.0431554	-0.0476309	0.0357249	0.0191608	0.022594	-0.0171103	0.102102	0.035105
H3Nterm ac	0.0614394	-0.0740332	-0.0688299	-0.0657491	0.0726608	0.0283479	-0.058909	-0.167411	0.116773	-0.0357196	0.0855845	-0.0296048	0.115935	0.102493
H3K9 ac	0.130222	-0.136392	-0.124571	-0.116677	0.0811475	0.099884	-0.0204708	-0.201978	0.159972	-0.0815571	0.1391	-0.0896891	0.151966	0.148599
H3K14 ac	0.0816062	-0.0835475	-0.0760481	-0.0714881	0.0998656	0.0507708	-0.0462117	-0.164017	0.113782	-0.0344671	0.0942907	-0.0415565	0.111977	0.0944071
H3K18 ac	0.141871	-0.150683	-0.150303	-0.146608	0.162967	0.062809	0.0656166	-0.166806	0.164794	-0.128431	0.154338	-0.10591	0.090731	0.14829
H3K23 ac	-0.0370511	0.0400293	0.0477896	0.0505928	0.0448962	-0.0313892	-0.0706493	-0.0626476	-0.00376503	0.0650346	-0.0296231	0.0621361	0.0525039	-0.0207613
H3K27 ac	0.0639422	-0.0594579	-0.0601055	-0.058835	0.110431	0.00474528	-0.00506254	-0.137894	0.0790438	-0.0298804	0.0658691	-0.015355	0.0504288	0.0600601
H3K56 ac	0.355894	-0.374819	-0.359744	-0.346343	0.231158	0.277091	0.107233	-0.28406	0.374773	-0.306233	0.37622	-0.327025	0.221982	0.365656
H4Nterm ac	0.12453	-0.137518	-0.129563	-0.123962	0.0990086	0.0894411	-0.0235726	-0.188043	0.169706	-0.0900588	0.144313	-0.0930691	0.156338	0.163144
H4K8 ac	0.21849	-0.221608	-0.205792	-0.195215	0.100278	0.179467	-0.031679	-0.273937	0.241928	-0.130213	0.220829	-0.159509	0.222084	0.23891
H4K12 ac	0.208077	-0.213837	-0.201975	-0.193277	0.116325	0.151444	-0.0209172	-0.271788	0.234938	-0.138192	0.21734	-0.151292	0.197966	0.225981
H4K16 ac	0.050616	-0.0489374	-0.0266513	-0.0163287	-0.079739	0.0849545	-0.123839	-0.149312	0.0739709	0.0182098	0.0495656	-0.0238302	0.131889	0.0756051
